# Supplementary material
Source: publisher figshare collection journal article supplement (https://gsajournals.figshare.com/ndownloader/files/28456905)
Supplement: Supplementary file 1 [file 28456905]

## Sheet: Supplemental_Table_S2.xlsx
Supplemental Table S2: GenBank accession numbers for chimpanzee and rhesus macaque clones analyzed for this project
Clone	Accession	Palindrome
CH250-106M20	AC280444	P7
CH250-114J18	AC280531	P9/P10
CH250-136N6	AC280430	P3
CH250-137I15	AC280580	P26
CH250-168E3	AC280520	P21
CH250-174F12	AC280455	P21
CH250-191K20	AC280440	P2
CH250-197O3	AC280457	P6
CH250-228D11	AC280538	P11
CH250-236O7	AC280541	P8
CH250-371L16	AC280564	P9
CH250-398K19	AC280504	P21
CH250-412K19	AC280483	P6
CH250-417G7	AC280442	P26
CH250-424H13	AC280467	P25
CH250-462M8	AC280473	P21
CH250-487N16	AC280453	P26
CH250-491H11	AC280464	P24
CH250-493M11	AC280503	P25
CH250-498I16	AC280468	P11
CH250-503C21	AC280489	P25
CH250-503N19	AC280524	P25
CH250-540J3	AC280456	P11
CH250-541H5	AC280425	P3
CH250-563M7	AC280492	P3
CH250-80G22	AC280568	P9
CH250-87B7	AC280549	P7
CH250-94G2	AC280518	P3
CH251-161L14	AC280465	P7
CH251-177B21	AC280525	P2
CH251-183G21	AC280578	P8
CH251-239P10	AC280533	P26
CH251-240O17	AC280544	P6
CH251-277H18	AC280556	P7
CH251-285D14	AC280499	P26
CH251-346A10	AC280446	P25
CH251-397P16	AC280507	P3
CH251-4M24	AC280567	P11
CH251-504H5	AC280540	P10
CH251-506D4	AC280415	P6
CH251-514B7	AC280488	P8
CH251-542A6	AC280462	P10
CH251-565G15	AC280459	P21
CH251-635P13	AC280558	P11
CH251-651H9	AC280522	P11
CH251-657L4	AC280546	P9/P10
CH251-658J15	AC280445	P8
CH251-65E21	AC280530	P24
CH251-671I19	AC280576	P3
CH251-677L24	AC280565	P24/P25
CH251-737G9	AC280491	P9/P10
CH251-73C22	AC280423	P2
